# Supplementary material
Source: PubMed Central journal article supplement (PMC3988757)
Supplement: 10.3163.1536-5050.102.2.008.sg001.pdf [file 10.3163.1536-5050.102.2.008.sg001.pdf]

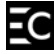

## Information empowerment: predeparture resource training for students in global health

Gurpreet K. Rana, MLIS

**Figure 1**

The University of Michigan Medical School's Global Health and Disparities Path of Excellence  
cocurriculum LibGuide

The screenshot displays the 'UMMS Global Health and Disparities Path of Excellence - An Information Resource Starter Kit' LibGuide. The page features a navigation bar with tabs for 'Getting Started: Research', 'Getting Started: Data Sources', 'Funding', 'Country Profiles', 'Faculty Clearinghouse', and 'Finding Tools'. Below the navigation bar, there is a search bar and a 'Print Page' link. The main content area is divided into several sections:

- Database Searching:** A section titled 'Getting started with.....' listing databases like PubMed, EMBASE, Scopus, Web of Science, and PsycINFO.
- PubMed Instant Search:** Two sections for 'International Health' and 'Disparities', each with a list of articles and links to view the website or feed.
- GHD - Resource and Event Spotlight:** A section with links to 'NEW Library Research Guide: Sexual and Reproductive Health' and 'GIDEON (Global Infectious Disease & Epidemiology Network)'.
- Global Health:** A section with a 'Highly Recommended' link to 'Global Health and Information Resources Guide' and 'Highlighted Starting Points' for 'Global Health', 'PubMed (with MGet It links)', 'Tropical Diseases Bulletin', 'EMBASE', and 'Scopus'.
- Subject Guide:** A section featuring a portrait of Gurpreet (Preet) Rana, her name, and contact information including her title as Global Health Coordinator at the Taubman Health Sciences Library, University of Michigan, and links to her profile and guides.
- UN Millennium Development Goals:** A section at the bottom right.
