# Supplementary material
Source: PubMed Central journal article supplement (PMC3988757)
Supplement: 10.3163.1536-5050.102.2.008.sg002.pdf [file 10.3163.1536-5050.102.2.008.sg002.pdf]

## Information empowerment: predeparture resource training for students in global health

Gurpreet K. Rana, MLIS

**Figure 2**

Example training material: identifying research question and relevant information resources

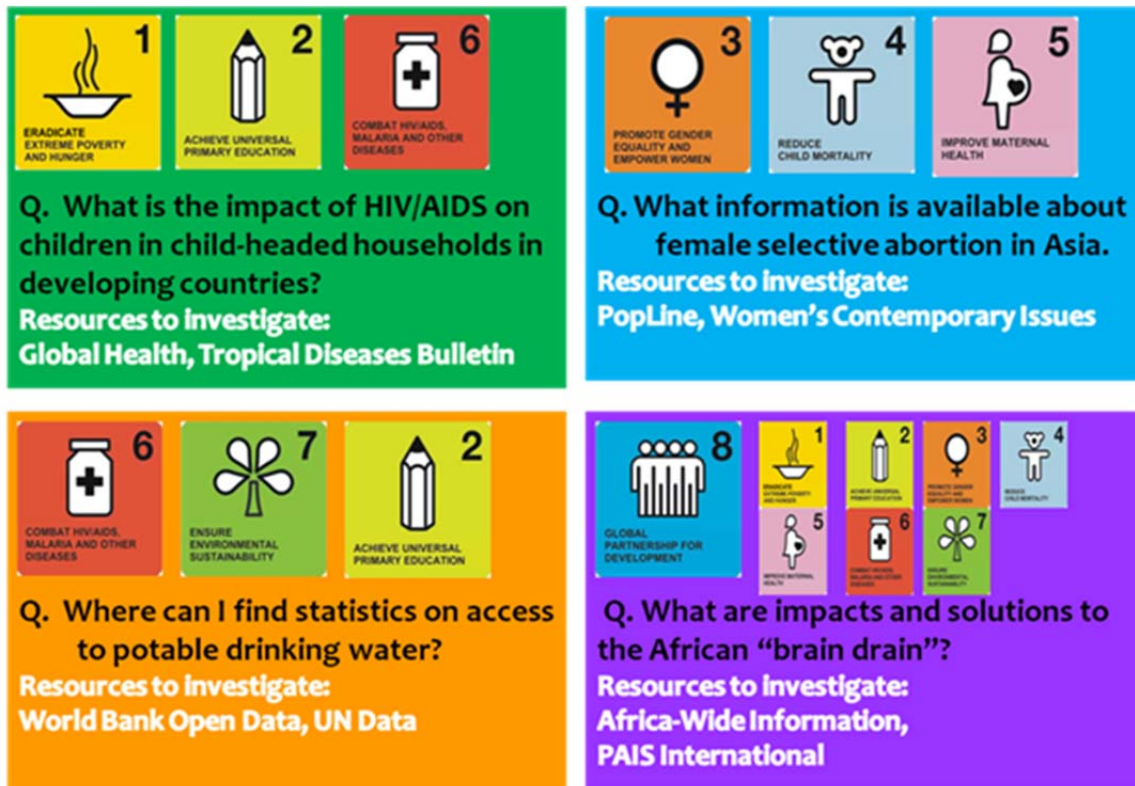

**Card 1 (Green):**  
 Icons: 1 (Eradicate Extreme Poverty and Hunger), 2 (Achieve Universal Primary Education), 6 (Combat HIV/AIDS, Malaria and other diseases).  
 Q. What is the impact of HIV/AIDS on children in child-headed households in developing countries?  
 Resources to Investigate: Global Health, Tropical Diseases Bulletin

**Card 2 (Blue):**  
 Icons: 3 (Promote Gender Equality and Empower Women), 4 (Reduce Child Mortality), 5 (Improve Maternal Health).  
 Q. What information is available about female selective abortion in Asia.  
 Resources to Investigate: PopLine, Women's Contemporary Issues

**Card 3 (Orange):**  
 Icons: 6 (Combat HIV/AIDS, Malaria and other diseases), 7 (Ensure Environmental Sustainability), 2 (Achieve Universal Primary Education).  
 Q. Where can I find statistics on access to potable drinking water?  
 Resources to Investigate: World Bank Open Data, UN Data

**Card 4 (Purple):**  
 Icons: 8 (Global Partnership for Development), 1 (Eradicate Extreme Poverty and Hunger), 2 (Achieve Universal Primary Education), 3 (Promote Gender Equality and Empower Women), 4 (Reduce Child Mortality), 5 (Improve Maternal Health), 6 (Combat HIV/AIDS, Malaria and other diseases), 7 (Ensure Environmental Sustainability).  
 Q. What are impacts and solutions to the African "brain drain"?  
 Resources to Investigate: Africa-Wide Information, PAIS International
