# Supplementary material
Source: PubMed Central journal article supplement (PMC3988757)
Supplement: 10.3163.1536-5050.102.2.008.sg003.pdf [file 10.3163.1536-5050.102.2.008.sg003.pdf]

## Information empowerment: pre-departure resource training for students in global health

Gurpreet K. Rana, MLIS

**Figure 3**  
 Sample training material

|                                                                                                                                                                                                                                                                                                                                                                                                                                                                                                                                                                                                                                                                                                                                                                                |                                                                                                                                                                                                                                                                                                                                                                                        |
|--------------------------------------------------------------------------------------------------------------------------------------------------------------------------------------------------------------------------------------------------------------------------------------------------------------------------------------------------------------------------------------------------------------------------------------------------------------------------------------------------------------------------------------------------------------------------------------------------------------------------------------------------------------------------------------------------------------------------------------------------------------------------------|----------------------------------------------------------------------------------------------------------------------------------------------------------------------------------------------------------------------------------------------------------------------------------------------------------------------------------------------------------------------------------------|
| <p><b>Statistics</b></p> <p><i>"I have shown that Swedish top students know statistically significantly less about the world than the chimpanzees."</i></p> <p><small>—Hans Rosling, Professor of Global Health, Karolinska Institute and Gapminder co-founder, as presented in TEDtalk "Stats that reshape your worldview", June 2006"</small></p>                                                                                                                                                                                                                                                                                                                                          | <p><b>Databases</b></p> <p><i>"... Knowledge is power. Information is liberating. Education is the premise of progress, in every society, in every family."</i></p> <p><small>—Kofi Annan, UN Secretary-General, in an address to the World Bank Conference, 'Global Knowledge' (1997)</small></p>  |
| <p><b>Research guides</b></p> <p><i>"... In understanding what it means to grant individuals the right to health, we must acknowledge that this right is inextricably linked to the right to information...."</i></p> <p><small>—Agnes Binagwaho, Minister of Health of Rwanda. Blog Post: "The Right to Health cannot be separate from the Right to Information." April 25, 2011. GHD Blog, Harvard University. <a href="https://www.gohighereducation.org/blog/2011/04/11/the-right-to-health-cannot-be-separate-from-the-right-to-information/">https://www.gohighereducation.org/blog/2011/04/11/the-right-to-health-cannot-be-separate-from-the-right-to-information/</a></small></p>  | <p><b>Data Visualization</b></p> <p><i>"The greatest value of a picture is when it forces us to notice what we never expected to see."</i></p> <p><small>—Tukey, John W. <i>Exploratory Data Analysis</i>. Reading, Mass.: Addison-Wesley Pub. Co., 1977.</small></p>                              |
